# Supplementary material for: Arrdc4‐dependent extracellular vesicle biogenesis is required for sperm maturation
Source: PubMed Central journal article supplement (PMC8217992; doi:10.1002/jev2.12113), 2021-06-22

Figure S1

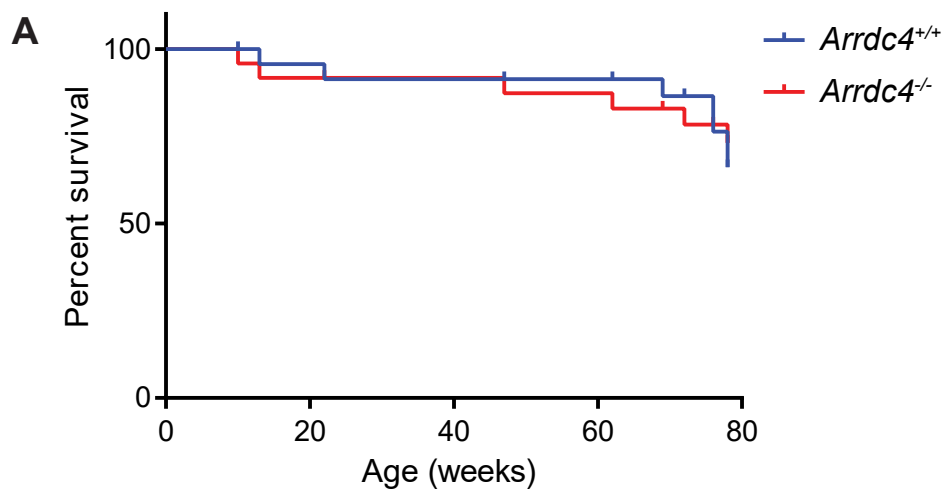

**B**

| Cause of death                  | <i>Arrdc4</i> <sup>+/+</sup> | <i>Arrdc4</i> <sup>-/-</sup> |
|---------------------------------|------------------------------|------------------------------|
| Skin wounds due to overgrooming | 3                            | 1                            |
| Ovarian cyst                    | 1                            |                              |
| Eye abscess                     | 1                            |                              |
| Fighting injury                 | 1                            |                              |
| Hydrocephalus                   | 1                            |                              |
| Hydronephrosis                  |                              | 1                            |
| Infection                       |                              | 2                            |
| Tumour                          | 2                            | 1                            |
| Unknown*                        |                              | 2                            |

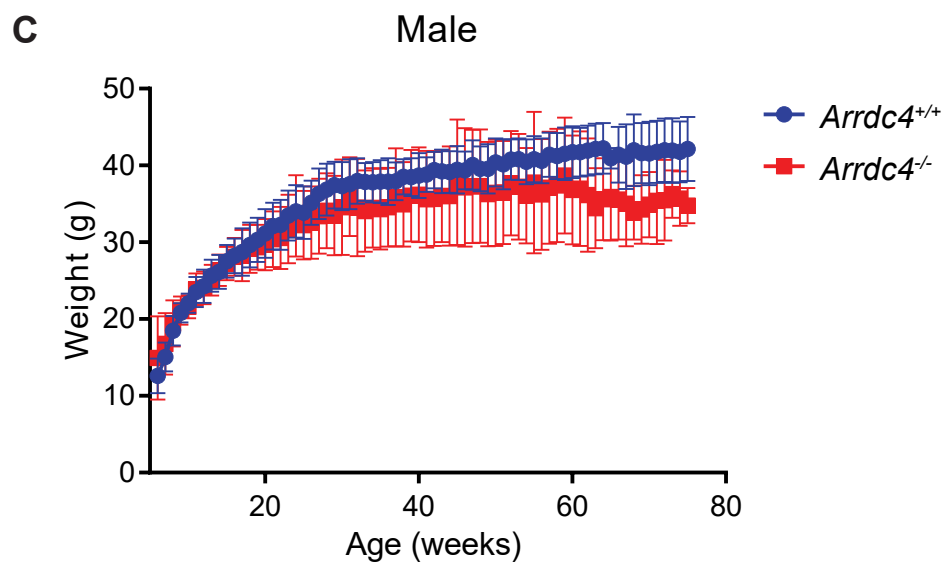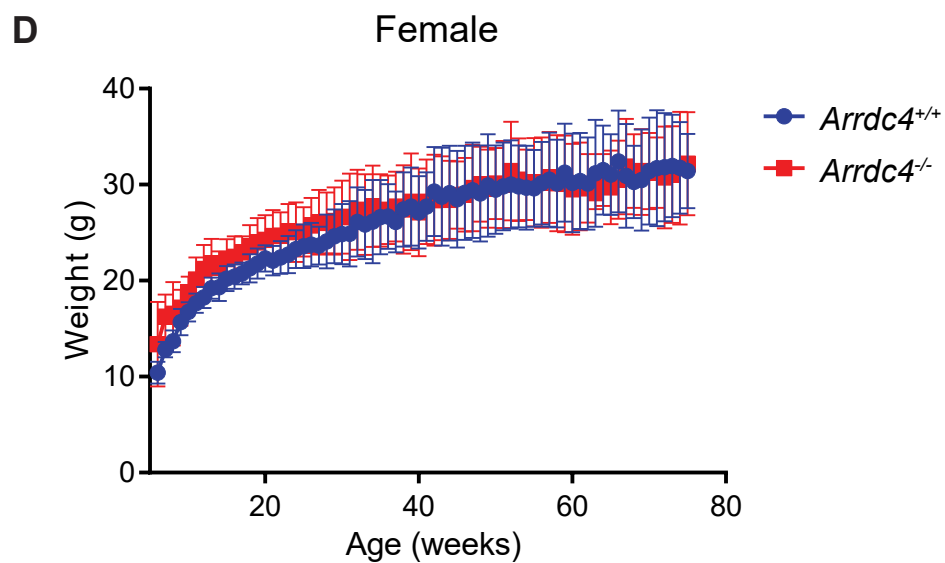

Supplement: JEV2-10-e12113-s002.pdf [file JEV2-10-e12113-s002.pdf]
