# Supplementary material for: Arrdc4‐dependent extracellular vesicle biogenesis is required for sperm maturation
Source: PubMed Central journal article supplement (PMC8217992; doi:10.1002/jev2.12113), 2021-06-22

Figure S6

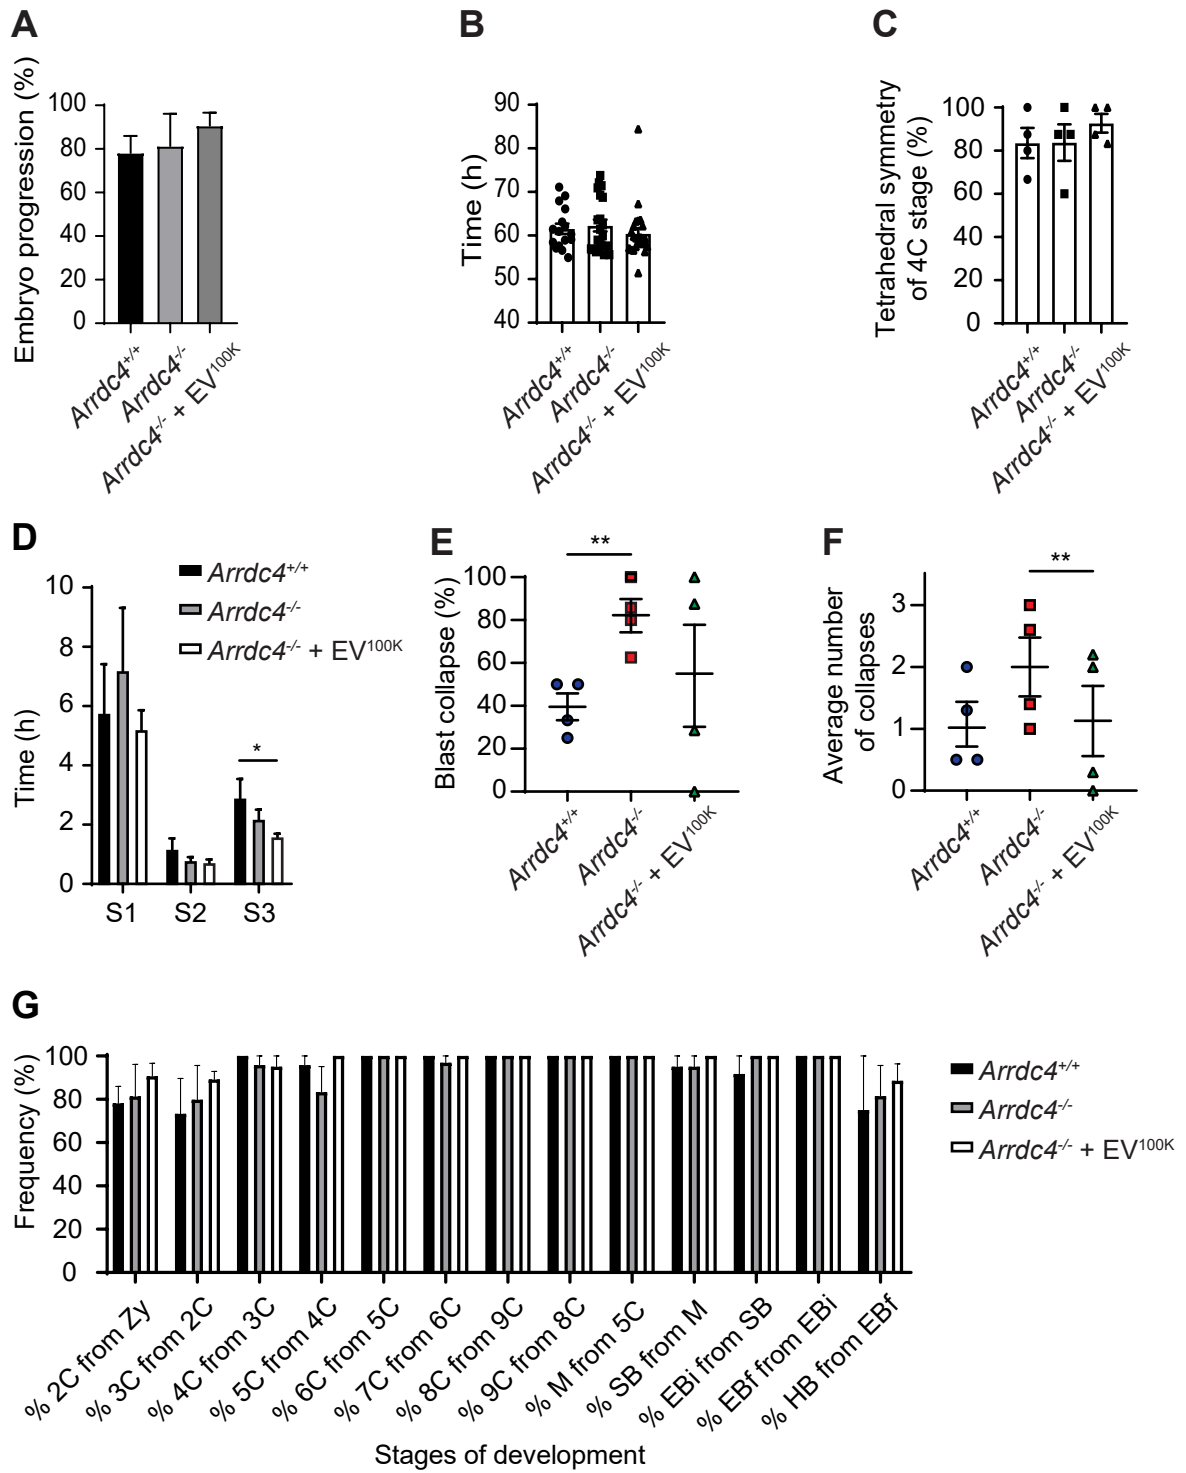

Supplement: JEV2-10-e12113-s007.pdf [file JEV2-10-e12113-s007.pdf]
